# Supplementary material for: Evaluation of ferroelectricity in a distorted wurtzite-type structure of Sc-doped LiGaO2
Source: Royal Society of Chemistry journal article supplement (doi:10.1039/d4ra02296c), 2024-01-01
Supplement: d4ra02296c1.pdf [file d4ra02296c1.pdf]

## Electronic supplementary information

### Evaluation of ferroelectricity in a distorted wurtzite-type structure of Sc-doped LiGaO<sub>2</sub>

Sou Yasuhara<sup>1,\*</sup>, Ayato Nakagawa<sup>1</sup>, Kazuki Okamoto<sup>2</sup>, Takahisa Shiraishi<sup>1</sup>, Hiroshi Funakubo<sup>2</sup>, Shintaro Yasui<sup>3,4</sup>, Mitsuru Itoh<sup>5</sup>, Takaaki Tsurumi<sup>1</sup>, Takuya Hoshina<sup>1</sup>

1. School of Materials and Chemical Technology, Tokyo Institute of Technology, 2-12-1 Ookayama, Meguro-ku, Tokyo 152-8550, Japan.
2. School of Materials and Chemical Technology, Tokyo Institute of Technology, 4259 Nagatsuta, Midori-ku, Yokohama, Kanagawa 226-8501, Japan.
3. Laboratory for Zero-Carbon Energy, Tokyo Institute of Technology, 2-12-1 Ookayama, Meguro-ku, Tokyo 152-8550, Japan.
4. Laboratory for Materials and Structures, Tokyo Institute of Technology, 4259 Nagatsuta, Midori-ku, Yokohama, Kanagawa 226-8503, Japan.
5. Office of Campus Management, Tokyo Institute of Technology, 4259 Nagatsuta, Midori-ku, Yokohama, Kanagawa 226-8501, Japan.

\* yasuhara.s.aa@m.titech.ac.jp

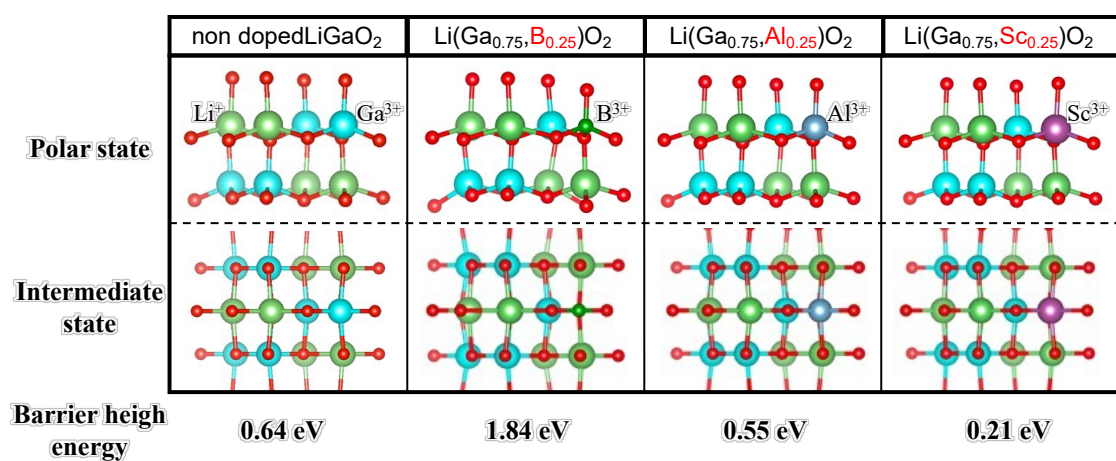

Figure S1. The polar and intermediate states of non-doped and doped  $\text{LiGaO}_2$  with B, Al, Sc. The calculated barrier height energies are also shown.

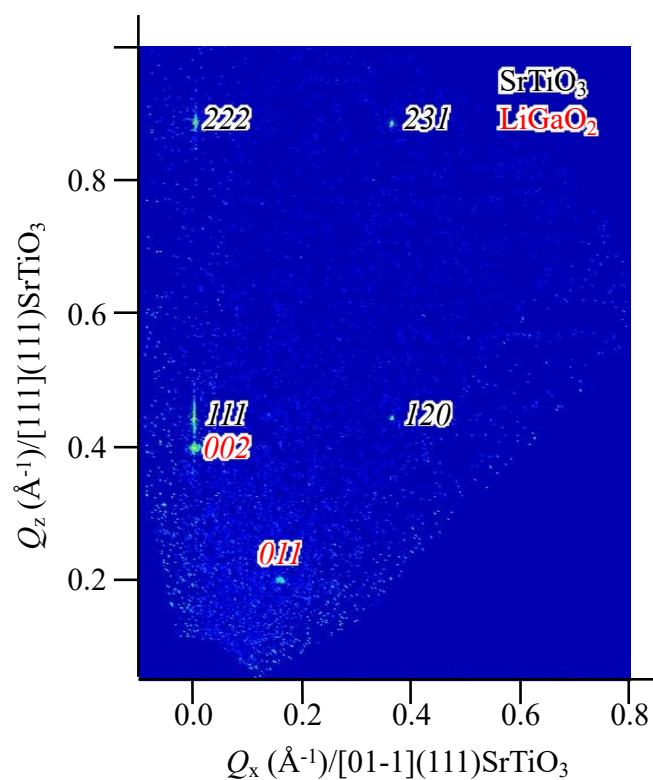

Figure S2. The XRD result of 2D reciprocal space mapping for a  $\text{LiGaO}_2/(\text{111})\text{SrTiO}_3$  film. The reflection index of  $\text{SrTiO}_3$  and  $\text{LiGaO}_2$  are written by black and red colors,

respectively.

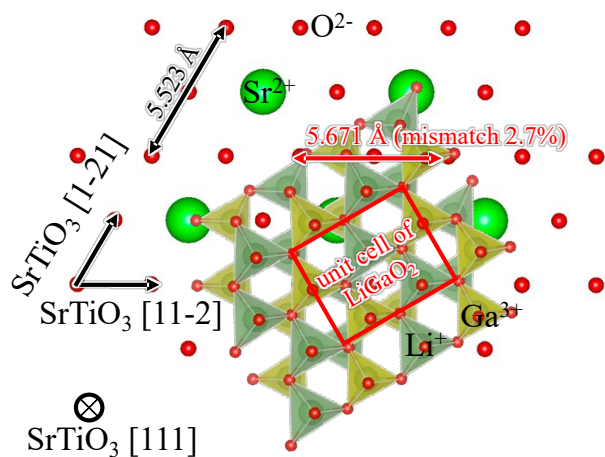

Figure S3. The relationship of crystal growth between (001)LiGaO<sub>2</sub> and (111)SrTiO<sub>3</sub>. The LiGaO<sub>2</sub> unit cell is well matched with a lattice mismatch of 2.7%.

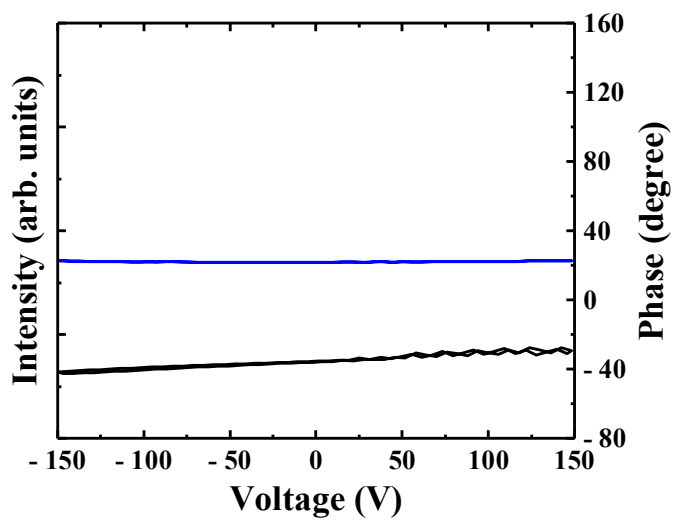

Figure S4. The PFM result for non-doped LiGaO<sub>2</sub> epitaxial thin film.

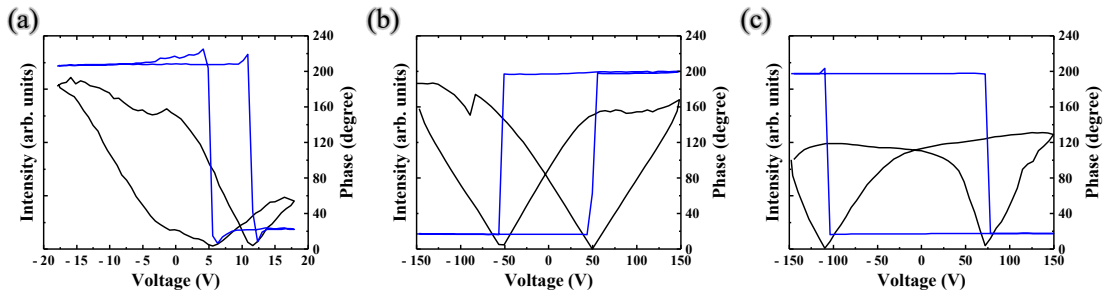

Figure S5. The PFM results measured at three different points for 20% Sc doped LiGaO<sub>2</sub> epitaxial thin film. The cross points of amplitude signal corresponding to polarization switching voltage are different depending on the measurement points.

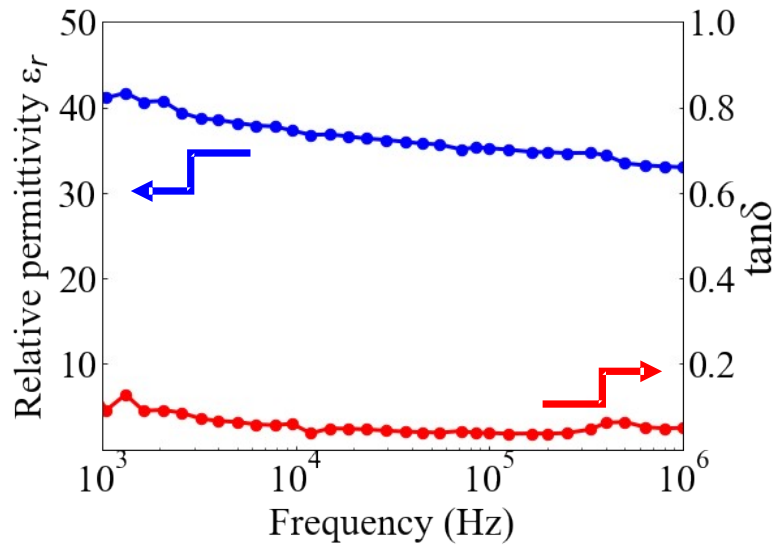

Figure S6. The frequency dependence of relative permittivity and dielectric loss of Sc-doped LiGaO<sub>2</sub> epitaxial thin film.
